# Supplementary material for: Optic nerve sheath diameter measured using magnetic resonance imaging and factors that influence results in healthy Chinese adults: a cross-sectional study
Source: PubMed Central journal article supplement — Chin Med J (Engl). 2021 Jan 11;134(18):2263–5. doi: 10.1097/CM9.0000000000001353 (PMC8478395; doi:10.1097/cm9.0000000000001353), 2021-01-11
Supplement: cm9-134-2263-s001.pdf [file cm9-134-2263-s001.pdf]

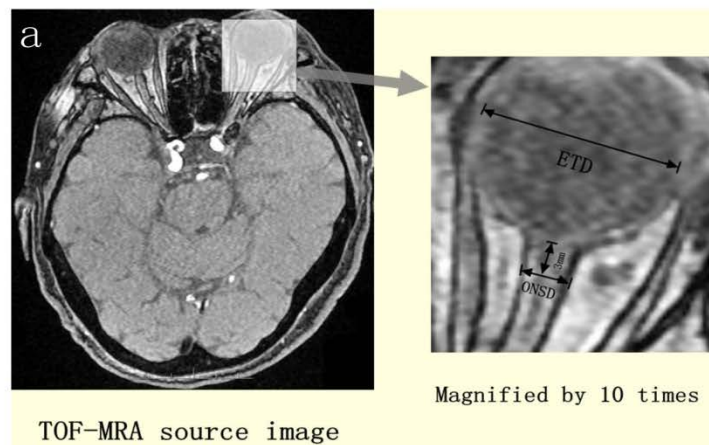

**b**  
 ONSD, ETD, and ONSD/ETD ratio measured using magnetic resonance imaging.

|                       | Mean±SD (95%CI)         | Median(IQR)        | Minimum | Maximum |
|-----------------------|-------------------------|--------------------|---------|---------|
| <b>ONSD(mm)</b>       |                         |                    |         |         |
| Right                 | 4.75±0.49(4.71-4.80)    | 4.80(4.40-5.10)    | 3.60    | 6.80    |
| Left                  | 4.76±0.50(4.71-4.81)    | 4.70(4.40-5.10)    | 3.60    | 6.10    |
| Overall*              | 4.76±0.43(4.72-4.80)    | 4.75(4.45-5.05)    | 3.65    | 6.20    |
| <b>ETD(mm)</b>        |                         |                    |         |         |
| Right                 | 22.00±1.41(21.86-22.14) | 22.10(21.10-22.90) | 17.30   | 27.20   |
| Left                  | 22.12±1.41(21.98-22.25) | 22.10(21.20-23.10) | 18.10   | 26.40   |
| Overall*              | 22.06±1.28(21.94-22.18) | 22.00(21.20-22.90) | 18.30   | 26.80   |
| <b>ONSD/ETD ratio</b> |                         |                    |         |         |
| Right                 | 0.22±0.03(0.21-0.22)    | 0.22(0.20-0.23)    | 0.16    | 0.29    |
| Left                  | 0.22±0.02(0.21-0.22)    | 0.21(0.20-0.23)    | 0.15    | 0.30    |
| Overall*              | 0.22±0.02(0.21-0.22)    | 0.22(0.20-0.23)    | 0.16    | 0.28    |

**Supplementary Figure 1: (A)** Measurements of ONSD and ETD are performed on the basis of TOF-MRA source image. **(B)** ONSD, ETD, and ONSD/ETD ratio are measured using MRI. \*The overall value is the mean value for the left and right eyes. CI: Confidence interval; ETD: Eyeball transverse diameter; IQR: Interquartile range; MRA: Magnetic resonance angiography; MRI: Magnetic resonance imaging; ONSD: Optic nerve sheath diameter; SD: Standard deviation; TOF: Time of flight.
